# Supplementary material
Source: MDPI journal article supplement (https://www.mdpi.com/2227-9717/11/2/519)
Supplement: s1 [file s1]

## Supplementary Material

**Table S1.** Concentrations and impact of AD inhibitors reported in the literature.

| Inhibitor                    | Concentration (mg/L)            | Substrate                                      | Conditions                          | Performance reduction                                                                                           | Ref. |
|------------------------------|---------------------------------|------------------------------------------------|-------------------------------------|-----------------------------------------------------------------------------------------------------------------|------|
| TAN                          | 4000                            | Cattle manure                                  | CSTR 55 °C                          | 25% reduction in methane yield                                                                                  | [1]  |
| TAN                          | 5 and 7 g-N/L TAN               | Cattle manure                                  | UASB                                | 25% reduction in methane yield                                                                                  | [2]  |
| TAN                          | 4 and 7.5 g-N/L TAN             | Cattle manure                                  | SMA test                            | 50% reduced growth rate for methanogens                                                                         | [2]  |
| TAN                          | 1500-3000                       | -                                              | pH>7.4-7.6                          | Inhibitory                                                                                                      | [3]  |
| TAN                          | 10000 (1200mg/L FAN)            | Cattle manure                                  | CSTR 55 °C                          | Inhibition of the methanogenesis                                                                                | [4]  |
| FAN                          | 55 at 40 d<br>32 at 15 and 25 d | Acetate & Propionate                           | CSTR                                | Maximum tolerable concentration                                                                                 | [5]  |
| FAN                          | 61                              | Crab cooker wastewater                         | UASB 37 °C                          | 40% inhibition of methanogenic activity                                                                         | [6]  |
| FAN                          | 85                              | Crab cooker wastewater                         | ATA test 37 °C                      | 50% inhibition                                                                                                  | [6]  |
| FAN                          | >250                            | Chicken manure                                 | Batch test                          | Methane production ceased                                                                                       | [7]  |
| NO <sub>3</sub> <sup>-</sup> | 150 mg-N/L                      | Dextrin peptone                                | Batch test 35 °C                    | 52% reduction in methane production rate                                                                        | [8]  |
| NO <sub>3</sub> <sup>-</sup> | 300 mg-N/L                      | Dextrin peptone                                | CSTR 35 °C                          | 90% reduction in methane production rate<br>95% reduction in methane production rate (after recover of reactor) | [8]  |
| NO <sub>3</sub> <sup>-</sup> | 156 mg-N/L                      | Acetate                                        | Batch test                          | Methanogenesis inhibition                                                                                       | [9]  |
| NO <sub>3</sub> <sup>-</sup> | 10 mM                           | Soil                                           | Soil test                           | Stopped methanogenesis, recovery 70% methane production                                                         | [10] |
| NO <sub>3</sub> <sup>-</sup> | 5mM                             | H <sub>2</sub> /CO <sub>2</sub> and/or Acetate | <i>M. bakery</i> Batch test         | 65% reduction in methane production                                                                             | [10] |
| NO <sub>3</sub> <sup>-</sup> | 30 mM                           | H <sub>2</sub> /CO <sub>2</sub> and/or Acetate | <i>M. bryantii</i> Batch test       | 59% reduction in methane production                                                                             | [10] |
| NO <sub>3</sub> <sup>-</sup> | 8 COD/NO <sub>3</sub> -N        | Glucose                                        | Batch test 35 °C                    | 86% reduction in methane production                                                                             | [11] |
| NO <sub>3</sub> <sup>-</sup> | 8 COD/NO <sub>3</sub> -N        | Glucose                                        | CSTR 35 °C                          | 34.8% reduction of % of methane in biogas                                                                       | [11] |
| NO <sub>3</sub> <sup>-</sup> | 14.3 mM                         | Acetate or methanol                            | Batch test                          | 46% inhibition on <i>M. mazy</i> by competition                                                                 | [12] |
| NO <sub>2</sub> <sup>-</sup> | 50 mg-N/L                       | Dextrin peptone                                | Batch test 35 °C                    | 20% reduction in methane production rate                                                                        | [12] |
| NO <sub>2</sub> <sup>-</sup> | 315 mg-N/L                      | Glucose                                        | UASB 30 °C                          | 12% reduction                                                                                                   | [13] |
| NO <sub>2</sub> <sup>-</sup> | 50                              | Glucose                                        | Batch test Non-acclimated dispersed | 50% reduction SMA (Specific methanogenic activity)                                                              | [13] |

|                               |                                                          |                                                |                                                       |                                                                                                                  |      |
|-------------------------------|----------------------------------------------------------|------------------------------------------------|-------------------------------------------------------|------------------------------------------------------------------------------------------------------------------|------|
| NO <sub>2</sub> <sup>-</sup>  | 100                                                      | Glucose                                        | Batch test Non-acclimated granular                    | 50% reduction SMA                                                                                                | [13] |
| NO <sub>2</sub> <sup>-</sup>  | 100                                                      | Glucose                                        | Batch test Acclimated dispersed                       | 50% reduction SMA                                                                                                | [13] |
| NO <sub>2</sub> <sup>-</sup>  | 0.18mM<br>0.32mM NO <sub>x</sub>                         | Acetate or methanol                            | Batch test                                            | 96-97% inhibition <i>M. mazey</i><br>95% inhibition <i>M. mazey</i>                                              | [12] |
| NO <sub>2</sub> <sup>-</sup>  | 50uM                                                     |                                                | <i>M. bakery</i> Batch test                           | 50% reduction in methane production                                                                              | [10] |
| NO <sub>2</sub> <sup>-</sup>  | 1mM                                                      | H <sub>2</sub> /CO <sub>2</sub> and/or Acetate | <i>M. bryantii</i> Batch test                         | 50% reduction in methane production                                                                              | [10] |
| CN <sup>-</sup>               | 4.5, possible recovery<br>50, no recovery                | Fibber chemical plant wastewater               | Batch test                                            | 50% IC (toxic to the sludge's methane-producing activity)                                                        | [14] |
| CN <sup>-</sup>               | 5 mg/L                                                   | Cassava derived starch and VFA                 | UASB 33 °C                                            | 70% reduction in methane production                                                                              | [15] |
| CN <sup>-</sup>               | 125 mg/L                                                 | Cassava derived starch and VFA                 | UASB 33 °C                                            | 96% methane reduction with acclimation                                                                           | [10] |
| SO <sub>4</sub> <sup>2-</sup> | 150                                                      | Glucose for semi-batch, VFAs for SMA           | Granular sludge, Semi-batch, SMA to the outlet        | 65% SMA decrease using butyrate at 59 d, recovering at 114 d to 8% SMA decrease                                  | [16] |
| SO <sub>4</sub> <sup>2-</sup> | Change of COD/SO <sub>4</sub> from 20 to 0.5 (6000 mg/L) | Synthetic organic chemical industry wastewater | UASB 35 °C, Batch tests to the outlet                 | 27% reduction in methane production rate                                                                         | [17] |
| SO <sub>4</sub> <sup>2-</sup> | 2.2 kg SO <sub>4</sub> /m <sup>3</sup> /d                | Mussels process wastewater                     | Anaerobic filter 37 °C                                | 15% and 2% of Propionate and acetate was converted by sulphate reducing microorganism instead of the methanogens | [18] |
| SO <sub>4</sub> <sup>2-</sup> | 1500 (6.7 COD/SO <sub>4</sub> ratio)                     | Sewage sludge                                  | CSTR 35 °C                                            | Decrease of 33% of methane production                                                                            | [19] |
| Cd                            | 170<br>Pulse feed:680                                    | Sludge                                         | Fixed film bed reactor<br>Semi-continuous 22 °C       | 55% biogas reduction<br>Pulse feed:<br>84.8% decrease                                                            | [20] |
| Cd                            | 15-23<br>11-34 (with Nickel)                             | Acetate solution                               | Pure culture 60 °C                                    | 50% inhibition of thermophilic methanogens                                                                       | [21] |
| Cd                            | 3300                                                     | Sucrose                                        | Batch<br>Hydrogen generation<br>Granular sludge 26 °C | 50% reduction of hydrogen potential                                                                              | [22] |
| Cd                            | 36                                                       | Glucose                                        | Batch 5 d<br>Granular sludge 35 °C                    | 50% reduction of methane production                                                                              | [23] |
| Fe                            | 200                                                      | Sludge                                         | Batch 55 °C                                           | 50% biogas production using Fe NO <sub>3</sub>                                                                   | [24] |
| Fe (III)                      | 1 mM                                                     | Acetate                                        | Batch, Pure culture, <i>M. hungatei</i> 30 °C         | Almost completely inhibited methane production                                                                   | [25] |

|          |                         |                                        |                                                    |                                                                                                                                                       |      |
|----------|-------------------------|----------------------------------------|----------------------------------------------------|-------------------------------------------------------------------------------------------------------------------------------------------------------|------|
|          |                         | Carbon dioxide and hydrogen            |                                                    |                                                                                                                                                       |      |
| Fe (III) | 5-10 mM                 | Acetate<br>Carbon dioxide and hydrogen | Batch, Pure culture, <i>M. barkeri</i> 30 °C       | (H <sub>2</sub> /CO <sub>2</sub> ) significantly decreased methane production (acetate)<br>methane production was also significantly reduced but less | [25] |
| Zn       | 1500                    | Sucrose                                | Batch, Hydrogen generation, Granular sludge 26 °C  | 50% reduction of hydrogen potential                                                                                                                   | [22] |
| Zn       | 4.5                     | Sucrose                                | Batch 72 h, Hydrogen generation 35 °C              | 50% reduction of hydrogen production                                                                                                                  | [20] |
| Zn       | 7.5                     | Glucose                                | Batch 5 d, Granular sludge 35 °C                   | 50% reduction in methane production                                                                                                                   | [23] |
| Ni       | 1300                    | Sucrose                                | Batch, Hydrogen generation, Granular sludge 26 °C  | 50% reduction of hydrogen potential                                                                                                                   | [22] |
| Ni       | 50                      | Ethanol and acetate                    | EGSB                                               | 18% inhibition methanogen                                                                                                                             | [26] |
| Ni       | 14.5-130                | Acetate solution                       | Pure culture 60 °C                                 | 50% inhibition of thermophilic methanogens                                                                                                            | [21] |
| Ni       | 35                      | Glucose                                | Batch 5 d, Granular sludge 35 °C                   | 50% reduction of methane production                                                                                                                   | [23] |
| Cr       | 3000                    | Sucrose                                | Batch, Hydrogen generation, Granular sludge 26 °C  | 50% reduction of hydrogen potential                                                                                                                   | [22] |
| Cr       | 60                      | Sucrose                                | Batch 72 h<br>Hydrogen generation 35 °C            | 50% reduction of hydrogen production                                                                                                                  | [27] |
| Cr       | 50                      | Ethanol and acetate                    | EGSB                                               | 11% inhibition methanogens                                                                                                                            | [26] |
| Cr (III) | 775<br>Pulse feed: 3100 | Sludge                                 | Fixed film bed reactor<br>Semi-continuous 22 °C    | 52% biogas reduction<br>Pulse feed: 83% decrease                                                                                                      | [28] |
| Cr       | 27                      | Glucose                                | Batch 5 d, Granular sludge 35 °C                   | 50% reduction in methane production                                                                                                                   | [23] |
| Al       | 1000                    | Glucose for semi-batch, VFAs for SMA   | Granular sludge<br>Semi-batch<br>SMA to the outlet | 72% SMA decrease using butyrate at 59 d, recovering at 114 d to 21% SMA decrease and 36% SMA when 150 mg/L of sulphate was added                      | [16] |
| Al       | 2500                    | Synthetic waste                        | UASB semi-continuous                               | Digester failure (85% decrease of biogas volume approximately)                                                                                        | [29] |

|                  |                                          |                                            |                                                      |                                                                                            |      |
|------------------|------------------------------------------|--------------------------------------------|------------------------------------------------------|--------------------------------------------------------------------------------------------|------|
| Cu               | 6.5                                      | Sucrose                                    | Batch 72 h, Hydrogen generation 35 °C                | 50% reduction of hydrogen production                                                       | [27] |
| Cu               | 30                                       | Sucrose                                    | Batch, Hydrogen generation, Granular sludge 26 °C    | 50% reduction of hydrogen potential                                                        | [22] |
| Cu               | 2.4-14, 2.2-28 (with Ni)                 | Acetate solution                           | Pure culture 60 °C                                   | 50% inhibition of thermophilic methanogens                                                 | [21] |
| Cu               | 50                                       | Ethanol and acetate                        | EGSB                                                 | 21% methanogen inhibition with the presence of accumulated Cr<br>69% methanogen inhibition | [26] |
| Pb               | >5000                                    | Sucrose                                    | Batch, Hydrogen generation, Granular sludge 26 °C    | 50% reduction of hydrogen potential                                                        | [22] |
| As III           | 15.5 uM<br>27.1 uM<br>4.4 uM             | Acetate<br>Hydrogen<br>Lactate             | Batch test 1 d, Granular sludge 30 °C                | 50% inhibition of methanogens                                                              | [30] |
| As III           | 23.5                                     | Acetate                                    | Batch test for 1 week<br>Granular sludge 30 °C       | 36.9% inhibition of methanogens                                                            | [30] |
| As III           | 100uM                                    | Acetate                                    | Batch test 1 d, Flocculent sludge 30 °C              | 50% inhibition of methanogens                                                              | [30] |
| As V             | >500 uM                                  | Acetate or Hydrogen or Lactate             | Batch test 1 d, Granular and flocculent sludge 30 °C | Non-inhibition                                                                             | [30] |
| As V             | 500 uM                                   | Acetate                                    | Batch test for 4 d, flocculent sludge 30 °C          | Complete inhibition                                                                        | [30] |
| SeO <sub>3</sub> | 10 <sup>-3</sup> M<br>10 <sup>-2</sup> M | H <sub>2</sub> /CO <sub>2</sub><br>Acetate | Granular sludge<br>Semi-batch                        | >96% inhibition                                                                            | [31] |
| SeO <sub>4</sub> | 10 <sup>-3</sup> M                       | Acetate<br>H <sub>2</sub> /CO <sub>2</sub> | Granular sludge<br>Semi-batch                        | >96% inhibition                                                                            | [31] |
| Hg               | 125<br>Pulse feed: 500                   | Sludge                                     | Fixed film bed reactor<br>Semi-continuous 22 °C      | 60% biogas reduction<br>Pulse feed: 92% decrease after 2 days                              | [20] |
| F <sup>-</sup>   | 325                                      | Glucose                                    | Batch tests, Granular fermenters 30 °C               | 50% reduction of control activity                                                          | [32] |
| F <sup>-</sup>   | 36.5                                     | Propionate                                 | Batch test, acetogenic bacteria 30 °C                | 50% reduction of control activity                                                          | [32] |
|                  | 25.5                                     | Butyrate                                   |                                                      |                                                                                            |      |
| F <sup>-</sup>   | 34.5                                     | Acetate                                    | Batch test, Flocculent sludge 30 °C                  | 50% reduction of methanogenesis                                                            | [32] |
|                  | 82                                       | Hydrogen                                   |                                                      |                                                                                            |      |
| F <sup>-</sup>   | 18.1                                     | Acetate                                    | Batch test, Flocculent sludge 55 °C                  | 50% reduction of methanogenesis                                                            | [32] |
|                  | 433                                      | Hydrogen                                   |                                                      |                                                                                            |      |
| F <sup>-</sup>   | 160                                      | Acetate                                    | Batch test, Granular 30 °C                           | 50% reduction of methanogenesis                                                            | [32] |

|                 |       |                                             |                        |                                            |      |
|-----------------|-------|---------------------------------------------|------------------------|--------------------------------------------|------|
| Cl <sup>-</sup> | >5500 | Tannery wastewater                          | Contact filter reactor | Decreasing trend                           | [33] |
| Phenol          | 300   | Phenol, polyphenols, acetate and propionate | ATA and BMP 37 °C      | Reduction of expected ratio, 2.03, to 1.62 | [28] |
| Phenol          | 250   | Phenol                                      | 2 stage AD 35 °C       | 62% biogas production reduction            | [34] |

Continue stir reactor: CSTR; Up-flow anaerobic sludge blanket: UASB; Specific methanogenic activity: SMA; Expanded granular sludge bed: EGSB

**Table S2.** Statistics of the biogas and methane yield using ANOVA compared with the control test (if  $F > F_{crit}$  they are different).

|                                                   |                            |        |         |        |         |         |
|---------------------------------------------------|----------------------------|--------|---------|--------|---------|---------|
| <i>CuSO<sub>4</sub></i>                           | <i>mg Cu/L</i>             | 20     | 32      | 73     | 123     | 167     |
| Biogas                                            | F                          | 0.77   | 0.01    | 0.26   | 0.18    | 0.15    |
| Biogas                                            | F <sub>crit</sub>          | 7.71   | 7.71    | 7.71   | 7.71    | 7.71    |
| Methane                                           | F                          | 0.00   | 0.61    | 0.03   | 0.19    | 1.64    |
| Methane                                           | F <sub>crit</sub>          | 7.71   | 7.71    | 7.71   | 7.71    | 7.71    |
| <i>Al<sub>2</sub>(SO<sub>4</sub>)<sub>3</sub></i> | <i>mg Al/L</i>             | 85     | 210     | 771    | 1308    | 1534    |
| Biogas                                            | F                          | 0.14   | 0.00    | 24.59  | 39.19   | 309.83  |
| Biogas                                            | F <sub>crit</sub>          | 7.71   | 7.71    | 7.71   | 7.71    | 7.71    |
| Methane                                           | F                          | 0.13   | 10.82   | 29.84  | 155.46  | 1728.87 |
| Methane                                           | F <sub>crit</sub>          | 7.71   | 7.71    | 7.71   | 7.71    | 7.71    |
| <i>NaCl</i>                                       | <i>mg Cl/L</i>             | 1066   | 1941    | 2821   | 3666    | 4535    |
| Biogas                                            | F                          | 22.36  | 71.65   | 13.08  | 5.07    | 19.78   |
| Biogas                                            | F <sub>crit</sub>          | 7.71   | 7.71    | 7.71   | 7.71    | 7.71    |
| Methane                                           | F                          | 4.29   | 2.99    | 1.67   | 5.07    | 20.12   |
| Methane                                           | F <sub>crit</sub>          | 7.71   | 7.71    | 7.71   | 7.71    | 7.71    |
| <i>NaSO<sub>4</sub></i>                           | <i>mg SO<sub>4</sub>/L</i> | 162    | 308     | 600    | 1032    | 1466    |
| Biogas                                            | F                          | 5.18   | 59.24   | 66.89  | 247.08  | 47.18   |
| Biogas                                            | F <sub>crit</sub>          | 7.71   | 7.71    | 7.71   | 7.71    | 7.71    |
| Methane                                           | F                          | 65.10  | 115.08  | 193.43 | 715.63  | 204.86  |
| Methane                                           | F <sub>crit</sub>          | 7.71   | 7.71    | 7.71   | 7.71    | 7.71    |
| <i>CuCl<sub>2</sub></i>                           | <i>mg Cu/L</i>             | 22     | 91      | 198    | 501     | 804     |
| Biogas                                            | F                          | 802.48 | 823.00  | 567.04 | 292.74  | 2496.73 |
| Biogas                                            | F <sub>crit</sub>          | 7.71   | 7.71    | 7.71   | 7.71    | 7.71    |
| Methane                                           | F                          | 446.98 | 1105.54 | 239.50 | 241.92  | 4729.63 |
| Methane                                           | F <sub>crit</sub>          | 7.71   | 7.71    | 7.71   | 7.71    | 7.71    |
| <i>AlCl<sub>3</sub></i>                           | <i>mg Al/L</i>             | 82     | 203     | 760    | 1312    | 1531    |
| Biogas                                            | F                          | 5.69   | 19.16   | 284.00 | 2483.70 | 3709.46 |
| Biogas                                            | F <sub>crit</sub>          | 7.71   | 7.71    | 7.71   | 7.71    | 7.71    |
| Methane                                           | F                          | 8.59   | 11.85   | 549.89 | 4231.14 | 4233.74 |
| Methane                                           | F <sub>crit</sub>          | 7.71   | 7.71    | 7.71   | 7.71    | 7.71    |
| <i>ZnCl<sub>2</sub></i>                           | <i>mg Zn/L</i>             | 10     | 61      | 87     | 592     | 1307    |
| Biogas                                            | F                          | 0.22   | 0.23    | 6.07   | 1348.11 | 2973.37 |
| Biogas                                            | F <sub>crit</sub>          | 7.71   | 7.71    | 7.71   | 7.71    | 7.71    |
| Methane                                           | F                          | 0.00   | 4.87    | 3.76   | 1421.18 | 2923.37 |
| Methane                                           | F <sub>crit</sub>          | 7.71   | 7.71    | 7.71   | 7.71    | 7.71    |
| <i>NH<sub>4</sub>SO<sub>4</sub></i>               | <i>mg NH<sub>4</sub>/L</i> | 1460   | 1602    | 1764   | 2201    | 3405    |
| Biogas                                            | F                          | 3.61   | 0.03    | 10.75  | 47.23   | 28.78   |
| Biogas                                            | F <sub>crit</sub>          | 7.71   | 7.71    | 7.71   | 7.71    | 7.71    |
| Methane                                           | F                          | 36.82  | 4.68    | 49.21  | 19.93   | 18.83   |
| Methane                                           | F <sub>crit</sub>          | 7.71   | 7.71    | 7.71   | 7.71    | 7.71    |
| <i>NaNO<sub>3</sub></i>                           | <i>mg NO<sub>3</sub>/L</i> | 92     | 174     | 254    | 332     | 427     |
| Biogas                                            | F                          | 100.75 | 11.85   | 176.30 | 43.46   | 1.36    |
| Biogas                                            | F <sub>crit</sub>          | 7.71   | 7.71    | 7.71   | 7.71    | 7.71    |
| Methane                                           | F                          | 684.23 | 80.07   | 270.19 | 653.99  | 65.37   |
| Methane                                           | F <sub>crit</sub>          | 7.71   | 7.71    | 7.71   | 7.71    | 7.71    |
| <i>HgSO<sub>4</sub></i>                           | <i>mg Hg/L</i>             | 25     | 20      | 920    | 239     | 495     |
| Biogas                                            | F                          | 1.63   | 7.65    | 15.86  | 110.65  | 8.19    |
| Biogas                                            | F <sub>crit</sub>          | 7.71   | 7.71    | 7.71   | 7.71    | 7.71    |
| Methane                                           | F                          | 13.91  | 42.45   | 1.96   | 11.47   | 23.17   |
| Methane                                           | F <sub>crit</sub>          | 7.71   | 7.71    | 7.71   | 7.71    | 7.71    |
| <i>NH<sub>4</sub>Cl</i>                           | <i>mg NH<sub>4</sub>/L</i> | 976    | 1958    | 2946   | 3923    | 5162    |
| Biogas                                            | F                          | 0.09   | 0.16    | 0.87   | 5.62    | 28.21   |
| Biogas                                            | F <sub>crit</sub>          | 7.71   | 7.71    | 7.71   | 7.71    | 7.71    |
| Methane                                           | F                          | 0.57   | 0.00    | 0.06   | 1.73    | 23.79   |
| Methane                                           | F <sub>crit</sub>          | 7.71   | 7.71    | 7.71   | 7.71    | 7.71    |
| <i>NaHASO<sub>4</sub></i>                         | <i>mg As/L</i>             | 0.1    | 0.4     | 2      | 4       | 17      |

|                 |       |             |               |                |                    |                    |                    |
|-----------------|-------|-------------|---------------|----------------|--------------------|--------------------|--------------------|
| Biogas          | F     | 0.43        | 5.15          | 0.09           | 0.77               | 0.39               |                    |
| Biogas          | Fcrit | 7.71        | 7.71          | 7.71           | 7.71               | 7.71               |                    |
| Methane         | F     | 0.34        | 1.15          | 0.04           | 5.17               | 0.59               |                    |
| Methane         | Fcrit | 7.71        | 7.71          | 7.71           | 7.71               | 7.71               |                    |
| <i>Al+OH/pH</i> |       | <i>pH 5</i> | <i>pH 4.5</i> | <i>pH 6.55</i> | <i>Al 608 mg/L</i> | <i>Al 262 mg/L</i> | <i>Al 464 mg/L</i> |
| Biogas          | F     | 37.14       | 54.77         | 2.26           | 13.43              | 8.29               | 155.18             |
| Biogas          | Fcrit | 18.51       | 18.51         | 18.51          | 18.51              | 18.51              | 18.51              |
| Methane         | F     | 600.01      | 1761.45       | 0.97           | 17.10              | 18.25              | 104.83             |
| Methane         | Fcrit | 18.51       | 18.51         | 18.51          | 18.51              | 18.51              | 18.51              |

**Table S3.** Results from first-order and Gompertz model for the biogas formation kinetics on the BMP experiments (B=biogas; Conc= concentration on the reactor; C=control).

| Salt                                            | Ion             | Conc<br>(mg/L) | 1st order                   |                                |                   |       | Gompertz model               |               |                                |                   |       |
|-------------------------------------------------|-----------------|----------------|-----------------------------|--------------------------------|-------------------|-------|------------------------------|---------------|--------------------------------|-------------------|-------|
|                                                 |                 |                | $k_h$<br>(d <sup>-1</sup> ) | $P_{max}$<br>(mL<br>B/g<br>VS) | RMSE <sub>n</sub> | $r^2$ | $R_m$<br>(mL<br>B/g<br>VS/d) | $\lambda$ (d) | $P_{max}$<br>(mL<br>B/g<br>VS) | RMSE <sub>n</sub> | $r^2$ |
| (NH <sub>4</sub> ) <sub>2</sub> SO <sub>4</sub> | NH <sub>4</sub> | 635 (C)        | 0.46                        | 598                            | 0.15              | 0.91  | 111                          | 0.0           | 611                            | 0.11              | 0.98  |
| (NH <sub>4</sub> ) <sub>2</sub> SO <sub>4</sub> | NH <sub>4</sub> | 1460           | 0.59                        | 553                            | 0.11              | 0.928 | 132                          | 0.0           | 566                            | 0.12              | 0.992 |
| (NH <sub>4</sub> ) <sub>2</sub> SO <sub>4</sub> | NH <sub>4</sub> | 1602           | 0.62                        | 604                            | 0.10              | 0.939 | 150                          | 0.0           | 617                            | 0.13              | 0.983 |
| (NH <sub>4</sub> ) <sub>2</sub> SO <sub>4</sub> | NH <sub>4</sub> | 1764           | 0.58                        | 565                            | 0.11              | 0.932 | 132                          | 0.0           | 578                            | 0.12              | 0.990 |
| (NH <sub>4</sub> ) <sub>2</sub> SO <sub>4</sub> | NH <sub>4</sub> | 2201           | 0.43                        | 566                            | 0.12              | 0.897 | 113                          | 0.0           | 556                            | 0.03              | 0.998 |
| (NH <sub>4</sub> ) <sub>2</sub> SO <sub>4</sub> | NH <sub>4</sub> | 3405           | 0.32                        | 567                            | 0.17              | 0.824 | 96                           | 0.1           | 536                            | 0.02              | 0.996 |
| NH <sub>4</sub> Cl                              | NH <sub>4</sub> | 586 (C)        | 0.34                        | 635                            | 0.24              | 0.793 | 98                           | 0.0           | 570                            | 0.10              | 0.962 |
| NH <sub>4</sub> Cl                              | NH <sub>4</sub> | 976            | 0.36                        | 598                            | 0.21              | 0.835 | 90                           | 0.0           | 535                            | 0.13              | 0.931 |
| NH <sub>4</sub> Cl                              | NH <sub>4</sub> | 1958           | 0.19                        | 642                            | 0.30              | 0.841 | 57                           | 0.0           | 556                            | 0.06              | 0.989 |
| NH <sub>4</sub> Cl                              | NH <sub>4</sub> | 2946           | 0.03                        | 889                            | 0.50              | 0.672 | 32                           | 2.4           | 543                            | 0.16              | 0.977 |
| NH <sub>4</sub> Cl                              | NH <sub>4</sub> | 3923           | 0.02                        | 889                            | 0.47              | 0.682 | 22                           | 3.3           | 505                            | 0.17              | 0.993 |
| NH <sub>4</sub> Cl                              | NH <sub>4</sub> | 5162           | 0.00                        | 79                             | 0.92              | 0.654 | 24                           | 9.2           | 426                            | 0.65              | 0.991 |
| ZnSO <sub>4</sub>                               | Zn              | 0.26(C)        | 0.01                        | 2202                           | 0.55              | 0.278 | 4                            | 4.5           | 261                            | 0.17              | 0.935 |
| ZnSO <sub>4</sub>                               | Zn              | 2              | 0.04                        | 1662                           | 0.41              | 0.767 | 69                           | 1.4           | 830                            | 0.07              | 0.992 |
| ZnSO <sub>4</sub>                               | Zn              | 7              | 0.03                        | 1988                           | 0.45              | 0.753 | 80                           | 1.4           | 821                            | 0.11              | 0.983 |
| ZnSO <sub>4</sub>                               | Zn              | 112            | 0.00                        | 30016                          | 0.53              | 0.310 | 28                           | 2.0           | 655                            | 0.04              | 0.998 |
| ZnSO <sub>4</sub>                               | Zn              | 746            | 0.00                        | 20620                          | 0.63              | 0.308 | 12                           | 7.9           | 522                            | 0.07              | 0.994 |
| ZnSO <sub>4</sub>                               | Zn              | 760            | 0.00                        | 1725                           | 0.75              | 0.530 | 18                           | 21.4          | 477                            | 0.03              | 0.998 |
| ZnSO <sub>4</sub>                               | Zn              | 1676           | -                           | -                              | -                 | -     | -                            | -             | -                              | -                 | -     |
| ZnCl <sub>2</sub>                               | Zn              | 3 (C)          | 0.46                        | 598                            | 0.15              | 0.911 | 112                          | 0.0           | 611                            | 0.11              | 0.984 |
| ZnCl <sub>2</sub>                               | Zn              | 10             | 0.49                        | 615                            | 0.15              | 0.909 | 117                          | 0.0           | 638                            | 0.12              | 0.992 |
| ZnCl <sub>2</sub>                               | Zn              | 61             | 0.41                        | 628                            | 0.14              | 0.910 | 111                          | 0.0           | 627                            | 0.07              | 0.990 |
| ZnCl <sub>2</sub>                               | Zn              | 87             | 0.35                        | 659                            | 0.16              | 0.895 | 102                          | 0.0           | 640                            | 0.05              | 0.984 |
| ZnCl <sub>2</sub>                               | Zn              | 592            | -                           | -                              | -                 | -     | -                            | -             | -                              | -                 | -     |
| ZnCl <sub>2</sub>                               | Zn              | 1307           | -                           | -                              | -                 | -     | -                            | -             | -                              | -                 | -     |
| CuSO <sub>4</sub>                               | Cu              | 7 (C)          | 0.22                        | 621                            | 0.14              | 0.801 | 86                           | 0.0           | 546                            | 0.04              | 0.977 |
| CuSO <sub>4</sub>                               | Cu              | 20             | 0.27                        | 655                            | 0.10              | 0.878 | 117                          | 0.0           | 566                            | 0.06              | 0.955 |
| CuSO <sub>4</sub>                               | Cu              | 32             | 0.29                        | 611                            | 0.10              | 0.871 | 119                          | 0.0           | 538                            | 0.04              | 0.969 |



|                                                     |    |          |       |      |      |       |     |      |      |      |       |
|-----------------------------------------------------|----|----------|-------|------|------|-------|-----|------|------|------|-------|
| CuSO <sub>4</sub>                                   | Cu | 73       | 0.26  | 555  | 0.07 | 0.921 | 112 | 0.0  | 556  | 0.06 | 0.958 |
| CuSO <sub>4</sub>                                   | Cu | 123      | 0.23  | 624  | 0.13 | 0.853 | 98  | 0.0  | 524  | 0.06 | 0.957 |
| CuSO <sub>4</sub>                                   | Cu | 167      | 0.22  | 639  | 0.15 | 0.825 | 94  | 0.0  | 535  | 0.04 | 0.982 |
| CuCl <sub>2</sub>                                   | Cu | 0.1 (C)  | 0.41  | 890  | 0.12 | 0.890 | 131 | 0.0  | 908  | 0.05 | 0.994 |
| CuCl <sub>2</sub>                                   | Cu | 22       | 0.37  | 351  | 0.12 | 0.897 | 51  | 0.0  | 345  | 0.02 | 0.996 |
| CuCl <sub>2</sub>                                   | Cu | 91       | 0.14  | 481  | 0.24 | 0.662 | 45  | 0.8  | 373  | 0.02 | 0.996 |
| CuCl <sub>2</sub>                                   | Cu | 198      | 0.00  | 5679 | 0.65 | 0.230 | 23  | 2.9  | 256  | 0.11 | 0.955 |
| CuCl <sub>2</sub>                                   | Cu | 501      | -     | -    | -    | -     | -   | -    | -    | -    | -     |
| CuCl <sub>2</sub>                                   | Cu | 804      | -     | -    | -    | -     | -   | -    | -    | -    | -     |
| Al <sub>2</sub> (SO <sub>4</sub> ) <sub>3</sub>     | Al | 4 (C)    | 0.22  | 621  | 0.14 | 0.801 | 86  | 0.0  | 546  | 0.04 | 0.977 |
| Al <sub>2</sub> (SO <sub>4</sub> ) <sub>3</sub>     | Al | 85       | 0.27  | 611  | 0.10 | 0.884 | 106 | 0.0  | 544  | 0.05 | 0.955 |
| Al <sub>2</sub> (SO <sub>4</sub> ) <sub>3</sub>     | Al | 210      | 0.24  | 614  | 0.11 | 0.884 | 94  | 0.0  | 532  | 0.07 | 0.929 |
| Al <sub>2</sub> (SO <sub>4</sub> ) <sub>3</sub>     | Al | 771      | 0.10  | 572  | 0.28 | 0.668 | 60  | 0.7  | 395  | 0.04 | 0.989 |
| Al <sub>2</sub> (SO <sub>4</sub> ) <sub>3</sub>     | Al | 1309     | 4.00  | 21   | 0.09 | 0.000 | 15  | 50.0 | 19   | 0.82 | 0.001 |
| Al <sub>2</sub> (SO <sub>4</sub> ) <sub>3</sub>     | Al | 1534     | -     | -    | -    | -     | -   | -    | -    | -    | -     |
| AlCl <sub>3</sub>                                   | Al | 1 (C)    | 0.41  | 890  | 0.12 | 0.89  | 131 | 0.0  | 908  | 0.05 | 0.99  |
| AlCl <sub>3</sub>                                   | Al | 82       | 0.49  | 941  | 0.08 | 0.954 | 148 | 0.0  | 974  | 0.44 | 0.996 |
| AlCl <sub>3</sub>                                   | Al | 204      | 0.43  | 961  | 0.09 | 0.950 | 153 | 0.0  | 1008 | 0.07 | 0.996 |
| AlCl <sub>3</sub>                                   | Al | 760      | -     | -    | -    | -     | -   | -    | -    | -    | -     |
| AlCl <sub>3</sub>                                   | Al | 1312     | -     | -    | -    | -     | -   | -    | -    | -    | -     |
| AlCl <sub>3</sub>                                   | Al | 1531     | -     | -    | -    | -     | -   | -    | -    | -    | -     |
| Al <sub>2</sub> (SO <sub>4</sub> ) <sub>3</sub> +OH | Al | 0 (C)    | 1.00  | 546  | 0.46 | 0.014 | 154 | 0.2  | 524  | 0.03 | 0.957 |
| Al <sub>2</sub> (SO <sub>4</sub> ) <sub>3</sub> +OH | Al | 309      | 28.00 | 130  | 0.76 | 0.011 | 118 | 0.8  | 436  | 0.02 | 0.987 |
| Al <sub>2</sub> (SO <sub>4</sub> ) <sub>3</sub> +OH | Al | 511      | 0.03  | 2602 | 0.77 | 0.025 | 95  | 0.9  | 398  | 0.02 | 0.997 |
| Al <sub>2</sub> (SO <sub>4</sub> ) <sub>3</sub> +OH | Al | 607      | 23.21 | 41   | 0.89 | 0.012 | 80  | 1.2  | 373  | 0.02 | 0.994 |
| HCl                                                 | pH | 7.3 (C)  | 1.00  | 546  | 0.46 | 0.014 | 154 | 0.2  | 524  | 0.03 | 0.957 |
| HCl                                                 | pH | 6.6      | 1.00  | 536  | 0.45 | 0.019 | 131 | 0.1  | 516  | 0.03 | 0.974 |
| HCl                                                 | pH | 5.2      | 0.02  | 144  | 0.88 | 0.200 | 48  | 15.7 | 111  | 0.63 | 0.957 |
| HCl                                                 | pH | 4.5      | 0.03  | 31   | 0.92 | 0.135 | 25  | 25.1 | 118  | 0.34 | 0.992 |
| NaCl                                                | Na | 3360 (C) | 0.21  | 636  | 0.10 | 0.881 | 103 | 0.0  | 560  | 0.04 | 0.982 |
| NaCl                                                | Na | 3915     | 0.26  | 700  | 0.09 | 0.895 | 134 | 0.0  | 643  | 0.04 | 0.978 |
| NaCl                                                | Na | 4483     | 0.23  | 704  | 0.06 | 0.939 | 119 | 0.0  | 574  | 0.04 | 0.974 |
| NaCl                                                | Na | 5054     | 0.22  | 705  | 0.08 | 0.921 | 112 | 0.0  | 579  | 0.04 | 0.977 |

|                                   |    |             |      |       |      |       |     |     |     |      |       |
|-----------------------------------|----|-------------|------|-------|------|-------|-----|-----|-----|------|-------|
| NaCl                              | Na | 5601        | 0.19 | 626   | 0.09 | 0.911 | 88  | 0.0 | 494 | 0.05 | 0.971 |
| NaCl                              | Na | 6165        | 0.09 | 913   | 0.18 | 0.774 | 56  | 0.0 | 512 | 0.02 | 0.995 |
| Na <sub>2</sub> SO <sub>4</sub>   | Na | 3360<br>(C) | 0.21 | 636   | 0.10 | 0.881 | 103 | 0.0 | 560 | 0.04 | 0.982 |
| Na <sub>2</sub> SO <sub>4</sub>   | Na | 3430        | 0.25 | 637   | 0.05 | 0.952 | 115 | 0.0 | 538 | 0.05 | 0.958 |
| Na <sub>2</sub> SO <sub>4</sub>   | Na | 3499        | 0.27 | 595   | 0.05 | 0.962 | 116 | 0.0 | 512 | 0.05 | 0.951 |
| Na <sub>2</sub> SO <sub>4</sub>   | Na | 3639        | 0.27 | 575   | 0.05 | 0.956 | 114 | 0.0 | 499 | 0.05 | 0.959 |
| Na <sub>2</sub> SO <sub>4</sub>   | Na | 3846        | 0.31 | 523   | 0.03 | 0.978 | 118 | 0.0 | 466 | 0.05 | 0.947 |
| Na <sub>2</sub> SO <sub>4</sub>   | Na | 4054        | 0.27 | 593   | 0.05 | 0.954 | 115 | 0.0 | 511 | 0.05 | 0.952 |
| NaNO <sub>3</sub>                 | Na | 1370<br>(C) | 0.19 | 784   | 0.41 | 0.775 | 64  | 0.0 | 748 | 0.04 | 0.995 |
| NaNO <sub>3</sub>                 | Na | 1403        | 0.05 | 1073  | 0.39 | 0.722 | 32  | 1.6 | 694 | 0.09 | 0.997 |
| NaNO <sub>3</sub>                 | Na | 1433        | 0.00 | 12884 | 0.47 | 0.658 | 23  | 3.3 | 657 | 0.10 | 0.988 |
| NaNO <sub>3</sub>                 | Na | 1463        | 0.00 | 9507  | 0.39 | 0.677 | 25  | 4.0 | 652 | 0.15 | 0.996 |
| NaNO <sub>3</sub>                 | Na | 1491        | 0.02 | 1689  | 0.39 | 0.704 | 26  | 2.9 | 713 | 0.13 | 0.993 |
| NaNO <sub>3</sub>                 | Na | 1527        | 0.01 | 4685  | 0.42 | 0.702 | 30  | 3.0 | 780 | 0.10 | 0.997 |
| HgSO <sub>4</sub>                 | Hg | 0.03<br>(C) | 0.19 | 784   | 0.41 | 0.775 | 64  | 0.0 | 748 | 0.04 | 0.995 |
| HgSO <sub>4</sub>                 | Hg | 25          | 0.19 | 826   | 0.29 | 0.796 | 75  | 0.2 | 760 | 0.03 | 0.994 |
| HgSO <sub>4</sub>                 | Hg | 20          | 0.32 | 855   | 0.35 | 0.761 | 107 | 0.0 | 840 | 0.07 | 0.987 |
| HgSO <sub>4</sub>                 | Hg | 920         | 0.36 | 824   | 0.34 | 0.750 | 113 | 0.0 | 824 | 0.10 | 0.982 |
| HgSO <sub>4</sub>                 | Hg | 239         | 0.23 | 889   | 0.38 | 0.781 | 90  | 0.2 | 820 | 0.03 | 0.992 |
| HgSO <sub>4</sub>                 | Hg | 495         | 0.12 | 948   | 0.49 | 0.706 | 82  | 0.8 | 800 | 0.08 | 0.991 |
| Na <sub>2</sub> HAsO <sub>4</sub> | As | 0.03<br>(C) | 0.34 | 635   | 0.24 | 0.793 | 98  | 0.0 | 570 | 0.10 | 0.962 |
| Na <sub>2</sub> HAsO <sub>4</sub> | As | 0.1         | 0.32 | 612   | 0.25 | 0.787 | 87  | 0.0 | 554 | 0.10 | 0.975 |
| Na <sub>2</sub> HAsO <sub>4</sub> | As | 0.4         | 0.23 | 562   | 0.24 | 0.869 | 53  | 0.0 | 507 | 0.12 | 0.984 |
| Na <sub>2</sub> HAsO <sub>4</sub> | As | 2           | 0.24 | 594   | 0.22 | 0.901 | 56  | 0.0 | 511 | 0.16 | 0.920 |
| Na <sub>2</sub> HAsO <sub>4</sub> | As | 4           | 0.15 | 679   | 0.26 | 0.924 | 41  | 0.0 | 552 | 0.14 | 0.932 |
| Na <sub>2</sub> HAsO <sub>4</sub> | As | 17          | 0.03 | 883   | 0.48 | 0.761 | 25  | 2.2 | 536 | 0.18 | 0.982 |

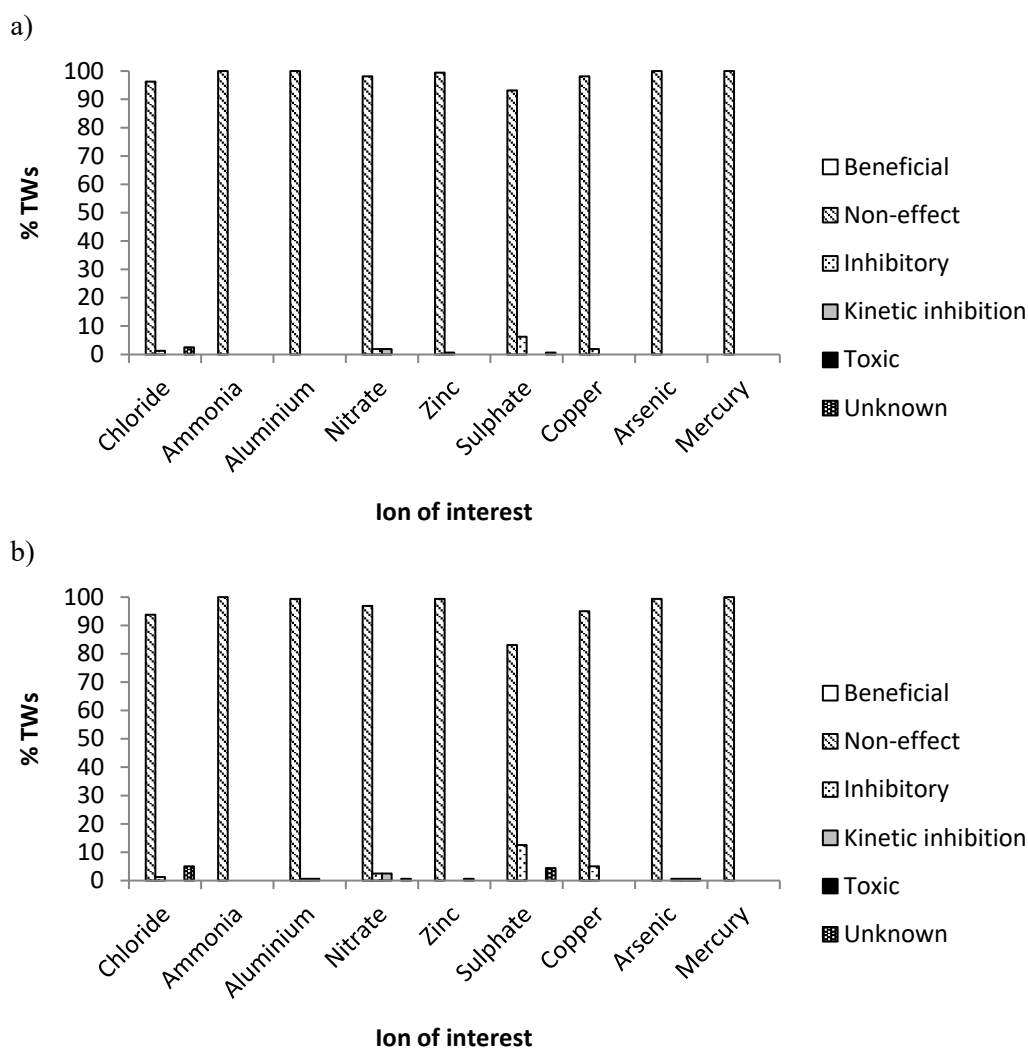

**Figure S1.** Percentage of TWs within the 160 studied that will incur in beneficial, non-effect, yield inhibition, kinetic inhibition, toxic or unknown impact if dosed to sewage sludge anaerobic digesters as 10% of the feedstock (a) or 30% of the feedstock (%) (b).

Description of Figure S1:

A more detailed investigation was conducted for scenarios with TW as 10% and 30% of the feedstock (10/90 and 30/70), for which potential impact as beneficial, non-effect, yield inhibition for methane yields, kinetic inhibition and toxic were investigated for the individual constituents present in the TWs. Another division called unknown was added to refer to conditions above the maximum concentration studied where no toxicity was observed. The 30/70 scenario was selected because it is reported to be the average spare capacity in municipal wastewater treatment plants digesters in Europe [35]. The 10/90 scenario was selected as 10% is commonly accepted by wastewater utilities to be the maximum spare capacity that could be allocated to TWs digestion without hindering sewage sludge treatment.

## References of Supplementary Materials

1. Angelidaki I, Ahring BK. Thermophilic anaerobic digestion of livestock waste: the effect of ammonia. *Appl Microbiol Biotechnol* 1993;38:560–4. <https://doi.org/10.1007/BF00242955>.
2. Borja R, Sánchez E, Weiland P. Influence of ammonia concentration on thermophilic anaerobic digestion of cattle manure in upflow anaerobic sludge blanket (UASB) reactors. *Process Biochem* 1996;31:477–83. [https://doi.org/http://dx.doi.org/10.1016/0032-9592\(95\)00099-2](https://doi.org/http://dx.doi.org/10.1016/0032-9592(95)00099-2).
3. McCarty PL. Anaerobic waste treatment fundamentals. *Public Work* 1964;95:107–12.
4. Nielsen HB, Angelidaki I. Strategies for optimizing recovery of the biogas process following ammonia inhibition. *Bioresour Technol* 2008;99:7995–8001. <https://doi.org/https://doi.org/10.1016/j.biortech.2008.03.049>.
5. Bhattacharya SK, Parkin GF. The Effect of Ammonia on Methane Fermentation Processes. *J (Water Pollut Control Fed)* 1989;61:55–9.
6. Boardman GD, McVeigh PJ. Use of UASB technology to treat crab processing wastewaters. *J Environ Eng* 1997;123:776.
7. Bujoczek G, Oleszkiewicz J, Sparling R, Cenkowski S. High Solid Anaerobic Digestion of Chicken Manure. *J Agric Eng Res* 2000;76:51–60. <https://doi.org/http://dx.doi.org/10.1006/jaer.2000.0529>.
8. Tugtas AE, Pavlostathis SG. Inhibitory effects of nitrogen oxides on a mixed methanogenic culture. *Biotechnol Bioeng* 2007;96:444–55. <https://doi.org/10.1002/bit.21105>.
9. Akunna JC, Bizeau C, Moletta R. Nitrate reduction by anaerobic sludge using glucose at various nitrate concentrations: Ammonification, denitrification and methanogenic activities. *Environ Technol* 1994;15:41–9. <https://doi.org/10.1080/09593339409385402>.
10. Klüber HD, Conrad R. Inhibitory effects of nitrate, nitrite, NO and N<sub>2</sub>O on methanogenesis by *Methanosarcina barkeri* and *Methanobacterium bryantii*. *FEMS Microbiol Ecol* 1998;25:331–9. <https://doi.org/10.1111/j.1574-6941.1998.tb00484.x>.
11. Yi X-H, Wan J, Ma Y, Wang Y, Guan Z, Jing D-D. Structure and Succession of Bacterial Communities of the Granular Sludge during the Initial Stage of the Simultaneous Denitrification and Methanogenesis Process. *Water, Air, Soil Pollut* 2017;228:121. <https://doi.org/10.1007/s11270-016-3168-5>.
12. Clarens M, Bernet N, Delgenès J-P, Moletta R. Effects of nitrogen oxides and denitrification by *Pseudomonas stutzeri* on acetotrophic methanogenesis by *Methanosarcina mazei*. *FEMS Microbiol Ecol* 1998;25:271–6. <https://doi.org/10.1111/j.1574-6941.1998.tb00479.x>.
13. Borges LI, López-Vazquez CM, García H, van Lier JB. Nitrite reduction and methanogenesis in a single-stage UASB reactor. *Water Sci Technol* 2015;72:2236 LP – 2242.
14. Yan G, Wang J, Guo S. Anaerobic Biochemical Treatment of Wastewater Containing Highly Concentrated Organic Cyanogen. *Energy Sources, Part A Recover Util Environ Eff* 2007;29:529–35. <https://doi.org/10.1080/009083190966342>.
15. Gijzen HJ, Bernal E, Ferrer H. Cyanide toxicity and cyanide degradation in anaerobic wastewater treatment. *Water Res* 2000;34:2447–54. [https://doi.org/10.1016/S0043-1354\(99\)00418-2](https://doi.org/10.1016/S0043-1354(99)00418-2).
16. Cabirol N, Barragán EJ, Durán A, Noyola A. Effect of aluminium and sulphate on anaerobic digestion of sludge from wastewater enhanced primary treatment. *Water Sci Technol* 2003;48:235 LP – 240.
17. Hu Y, Jing Z, Sudo Y, Niu Q, Du J, Wu J, et al. Effect of influent COD/SO<sub>4</sub><sup>2-</sup> ratios on UASB treatment of a synthetic sulfate-containing wastewater. *Chemosphere* 2015;130:24–33. <https://doi.org/https://doi.org/10.1016/j.chemosphere.2015.02.019>.
18. Soto M, Méndez R, Lema JM. Sodium inhibition and sulphate reduction in the anaerobic treatment of mussel processing wastewaters. *J Chem Technol Biotechnol* 1993;58:1–7. <https://doi.org/10.1002/jctb.280580102>.
19. Jeong T-Y, Chung H-K, Yeom SH, Choi SS. Analysis of methane production inhibition for treatment of sewage sludge containing sulfate using an anaerobic continuous degradation process. *Korean J Chem Eng* 2009;26:1319–22. <https://doi.org/10.1007/s11814-009-0229-0>.
20. Abdel-Shafy HI, Mansour MSM. Biogas production as affected by heavy metals in the

- anaerobic digestion of sludge. Egypt J Pet 2014;23:409–17. <https://doi.org/https://doi.org/10.1016/j.ejpe.2014.09.009>.
21. Ahring BK, Westermann P. Sensitivity of thermophilic methanogenic bacteria to heavy metals. Curr Microbiol 1985;12:273–6. <https://doi.org/10.1007/BF01567977>.
  22. Li C, Fang HHP. Inhibition of heavy metals on fermentative hydrogen production by granular sludge. Chemosphere 2007;67:668–73. <https://doi.org/https://doi.org/10.1016/j.chemosphere.2006.11.005>.
  23. Altaş L. Inhibitory effect of heavy metals on methane-producing anaerobic granular sludge. J Hazard Mater 2009;162:1551–6. <https://doi.org/https://doi.org/10.1016/j.jhazmat.2008.06.048>.
  24. Yu B, Lou Z, Zhang D, Shan A, Yuan H, Zhu N, et al. Variations of organic matters and microbial community in thermophilic anaerobic digestion of waste activated sludge with the addition of ferric salts. Bioresour Technol 2015;179:291–8. <https://doi.org/https://doi.org/10.1016/j.biortech.2014.12.011>.
  25. Van Bodegom PM, Scholten JCM, Stams AJM. Direct inhibition of methanogenesis by ferric iron. FEMS Microbiol Ecol 2004;49:261–8. <https://doi.org/10.1016/j.femsec.2004.03.017>.
  26. Colussi I, Cortesi A, Vedova L Della, Gallo V, Robles FKC. Start-up procedures and analysis of heavy metals inhibition on methanogenic activity in EGSB reactor. Bioresour Technol 2009;100:6290–4. <https://doi.org/https://doi.org/10.1016/j.biortech.2009.07.041>.
  27. Lin C-Y, Shei S-H. Heavy metal effects on fermentative hydrogen production using natural mixed microflora. Int J Hydrogen Energy 2008;33:587–93. <https://doi.org/https://doi.org/10.1016/j.ijhydene.2007.09.030>.
  28. O'Connor OA, Young LY. Toxicity and anaerobic biodegradability of substituted phenols under methanogenic conditions. Environ Toxicol Chem 1989;8:853–62. <https://doi.org/10.1002/etc.5620081003>.
  29. Hansen KH, Angelidaki I, Ahring BK. Anaerobic digestion of swine manure: Inhibition by ammonia. Water Res 1998;32:5–12. [https://doi.org/http://dx.doi.org/10.1016/S0043-1354\(97\)00201-7](https://doi.org/http://dx.doi.org/10.1016/S0043-1354(97)00201-7).
  30. Sierra-Alvarez R, Cortinas I, Yenal U, Field JA. Methanogenic Inhibition by Arsenic Compounds. Appl Environ Microbiol 2004;70:5688–91. <https://doi.org/10.1128/AEM.70.9.5688-5691.2004>.
  31. Lenz M, Janzen N, Lens PNL. Selenium oxyanion inhibition of hydrogenotrophic and acetoclastic methanogenesis. Chemosphere 2008;73:383–8. <https://doi.org/10.1016/J.CHEMOSPHERE.2008.05.059>.
  32. Ochoa-Herrera V, Banihani Q, León G, Khatri C, Field JA, Sierra-Alvarez R. Toxicity of fluoride to microorganisms in biological wastewater treatment systems. Water Res 2009;43:3177–86. <https://doi.org/https://doi.org/10.1016/j.watres.2009.04.032>.
  33. Vijayaraghavan K, Ramanujam TK. Effect of chloride and condensable tannin in anaerobic degradation of tannery wastewaters. Bioprocess Eng 1999;20:499. <https://doi.org/10.1007/s004490050621>.
  34. Hernandez JE, Edyvean RGJ. Comparison between a two-stage and single-stage digesters when treating a synthetic wastewater contaminated with phenol. Water SA 2011. <https://doi.org/10.4314/wsa.v37i1.64103>.
  35. Maragkaki AE, Fountoulakis M, Kyriakou A, Lasaridi K, Manios T. Boosting biogas production from sewage sludge by adding small amount of agro-industrial by-products and food waste residues. Waste Manag 2018;71:605–11. <https://doi.org/10.1016/j.wasman.2017.04.024>.
